# Supplementary material for: Glycosidic α-linked mannopyranose disaccharides: an NMR spectroscopy and molecular dynamics simulation study employing additive and Drude polarizable force fields
Source: Royal Society of Chemistry journal article supplement (doi:10.1039/d2cp05203b), 2022-12-21
Supplement: d2cp05203b1.pdf [file d2cp05203b1.pdf]

# Glycosidic $\alpha$ -linked mannopyranose disaccharides: An NMR spectroscopy and molecular dynamics simulation study employing additive and Drude polarizable force fields

Alessandro Ruda,<sup>‡a</sup> Asaminew H. Aytenfisu,<sup>‡b</sup> Thibault Angles d'Ortoli,<sup>a</sup> Alexander D. MacKerell, Jr.<sup>\*b</sup> and Göran Widmalm<sup>\*a</sup>

<sup>a</sup> Department of Organic Chemistry, Arrhenius Laboratory, Stockholm University, S-106 91 Stockholm, Sweden

<sup>b</sup> Department of Pharmaceutical Sciences, School of Pharmacy, University of Maryland, Baltimore, Maryland 21201

<sup>‡</sup>A.R. and A.H.A. contributed equally to this work.

\*Corresponding authors: [alex@outerbanks.umaryland.edu](mailto:alex@outerbanks.umaryland.edu) and [goran.widmalm@su.se](mailto:goran.widmalm@su.se)

## Supporting information

### Table of contents

|                                                                      |              |
|----------------------------------------------------------------------|--------------|
| Rotameric distributions of the $\omega$ torsion angles               | page S2 – S4 |
| Individual dipole moment distributions of hydroxyl groups            | page S5 – S6 |
| Radial distribution functions of water oxygen and sugar oxygen atoms | page S7 – S9 |

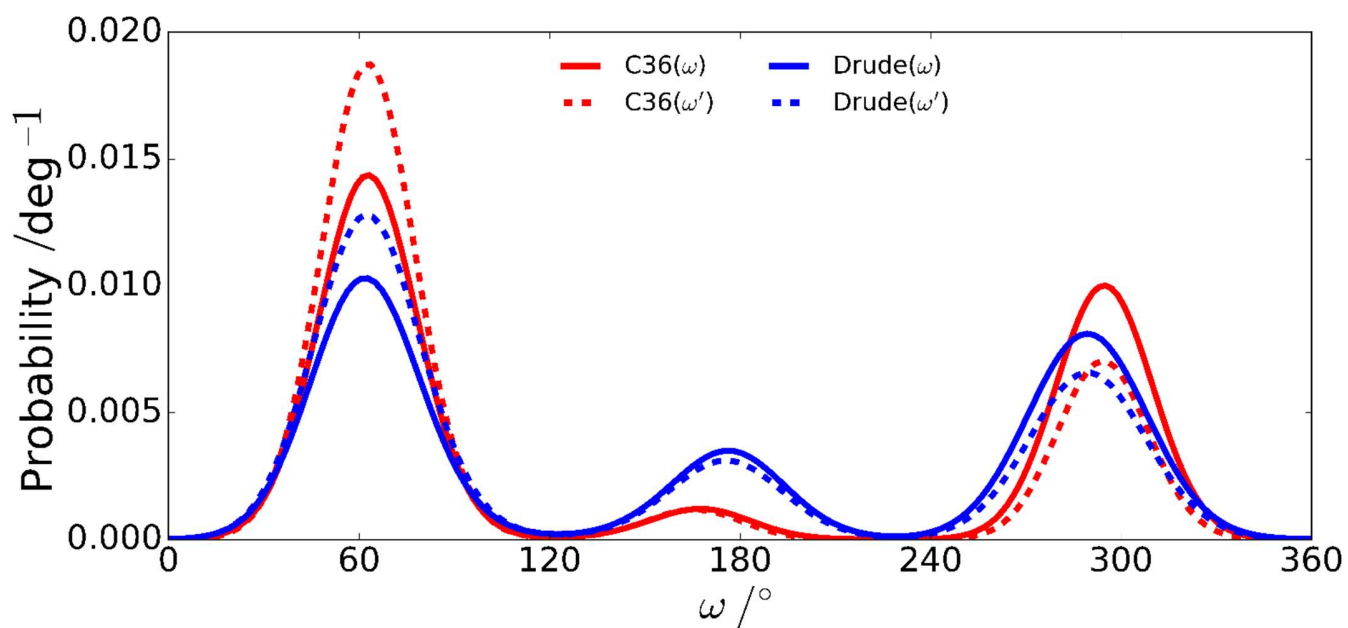

Figure S1. Rotameric distributions of the  $\omega$  torsion angles in **M2M** for the additive C36 and the polarizable Drude force fields.

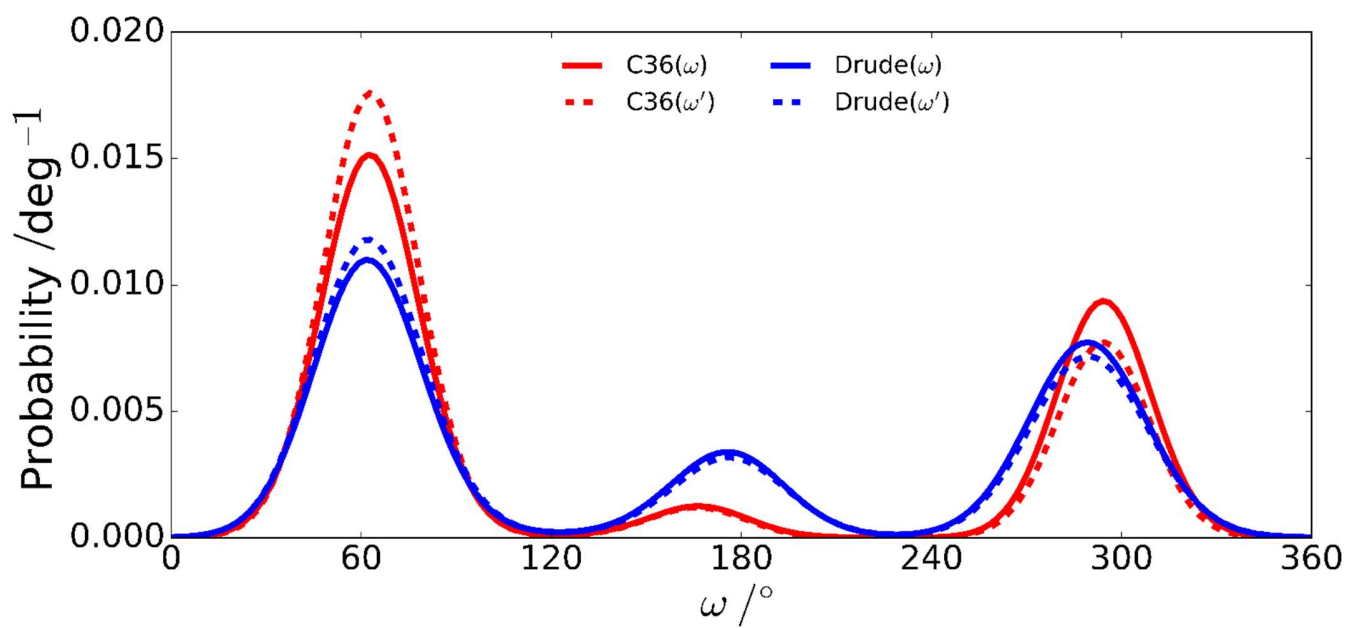

Figure S2. Rotameric distributions of the  $\omega$  torsion angles in **M3M** for the additive C36 and the polarizable Drude force fields.

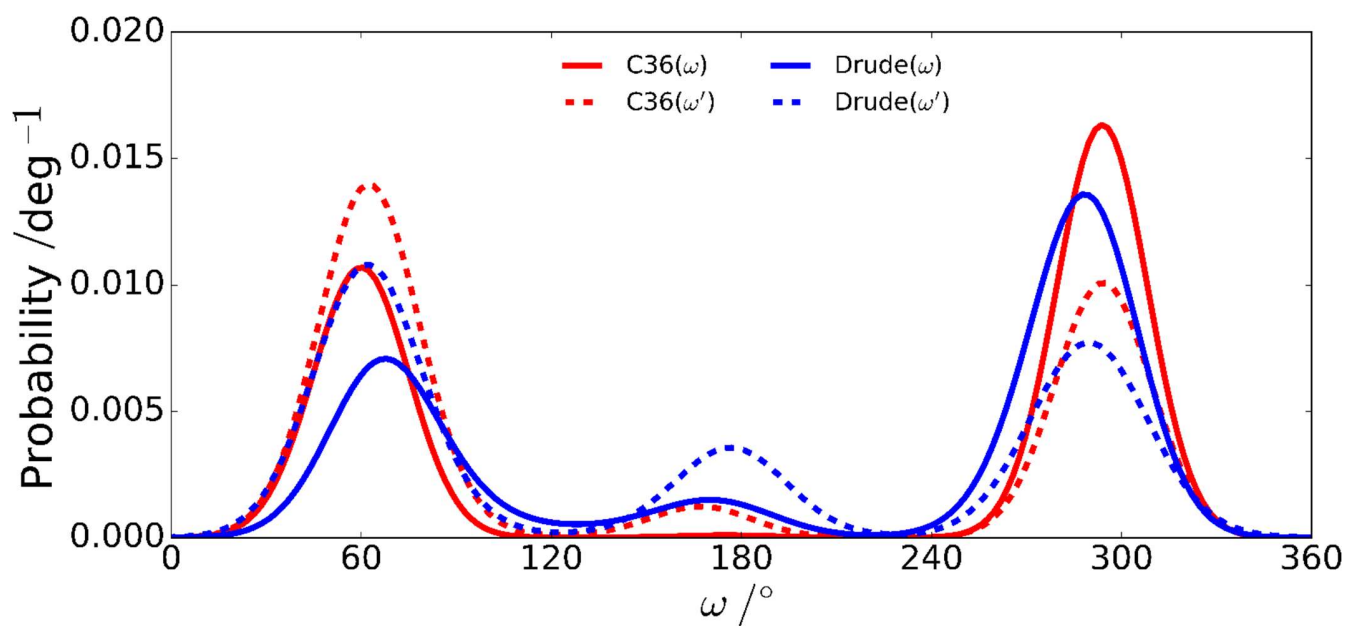

Figure S3. Rotameric distributions of the  $\omega$  torsion angles in **M6M** for the additive C36 and the polarizable Drude force fields.

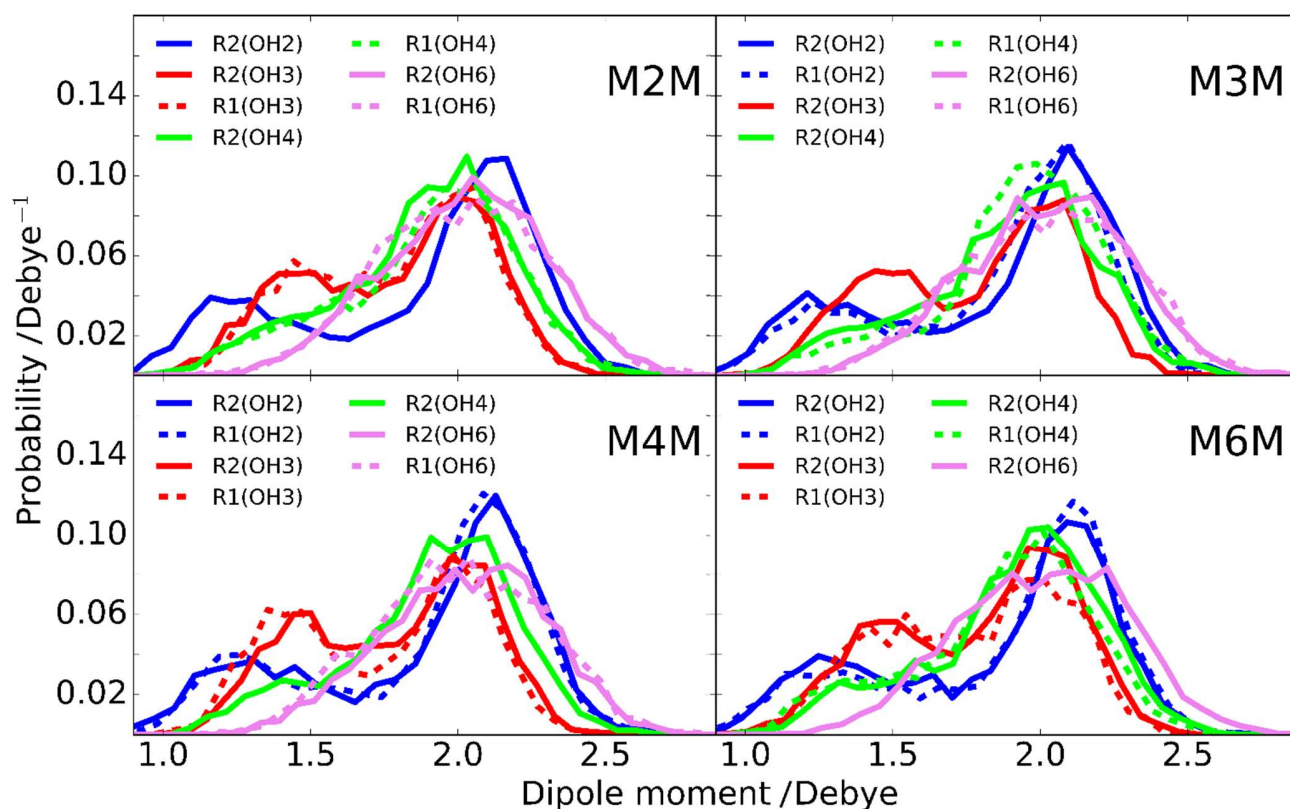

Figure S4. Individual dipole moment distributions of the hydroxyl groups of the  $\alpha$ -linked mannopyranose disaccharides from the Drude simulations for the for the reducing end residue (R1, solid line) and the terminal residue (R2, dashed line). Results are shown for hydroxyl groups at positions 2 (blue), 3 (red), 4 (green) and 6 (purple). Hydroxyl dipole moments include contributions from the OH group, covalently linked CH<sub>n</sub> atoms, and lone pairs as their charges sum to zero. Note that each panel is devoid of a dashed line, since the oxygen atom of the missing hydroxyl group is part of the pertinent glycosidic linkage.

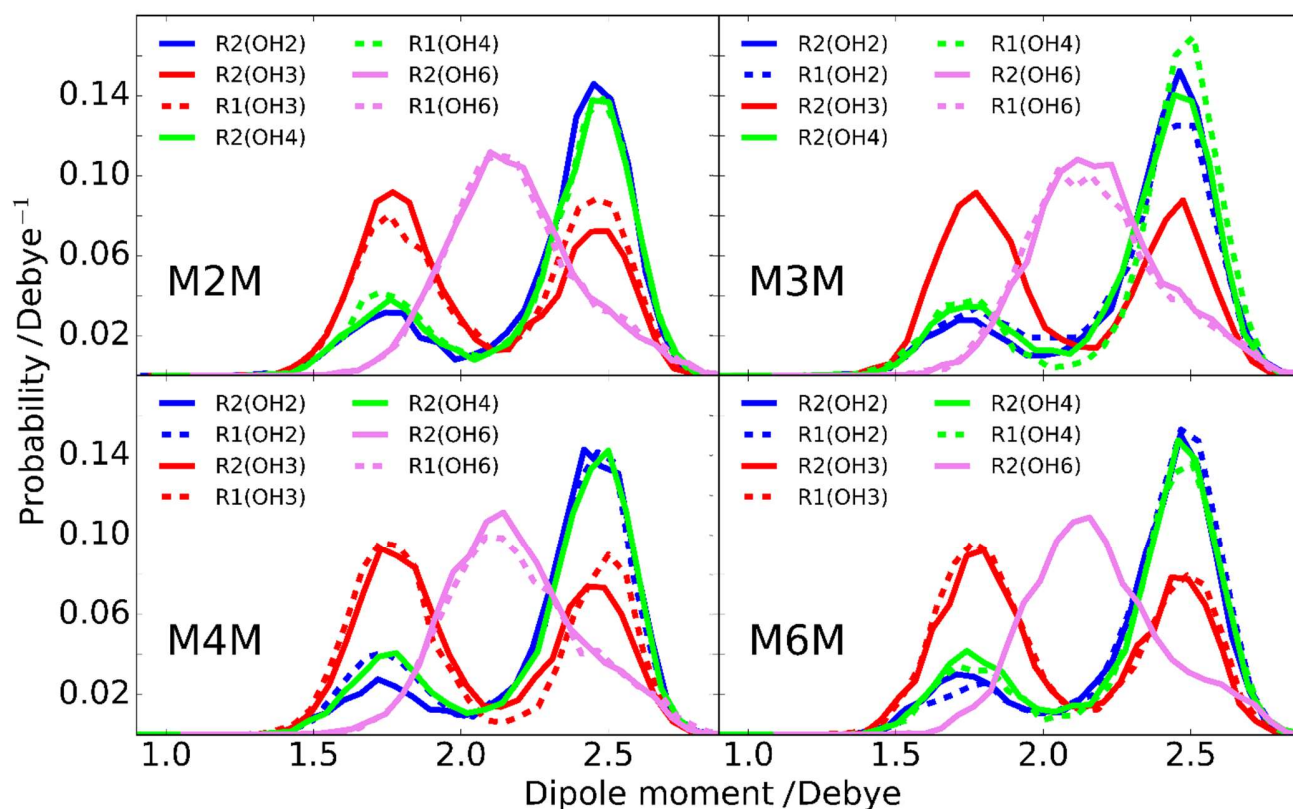

Figure S5. Individual dipole moment distributions of the hydroxyl groups of the  $\alpha$ -linked mannopyranose disaccharides from the Additive C36 simulations for the reducing end residue (R1, solid line) and the terminal residue (R2, dashed line). Results are shown for hydroxyl groups at positions 2 (blue), 3 (red), 4 (green) and 6 (purple). Hydroxyl dipole moments include contributions from the OH group and covalently linked  $\text{CH}_n$  atoms as their charges sum to zero. Note that each panel is devoid of a dashed line, since the oxygen atom of the missing hydroxyl group is part of the pertinent glycosidic linkage.

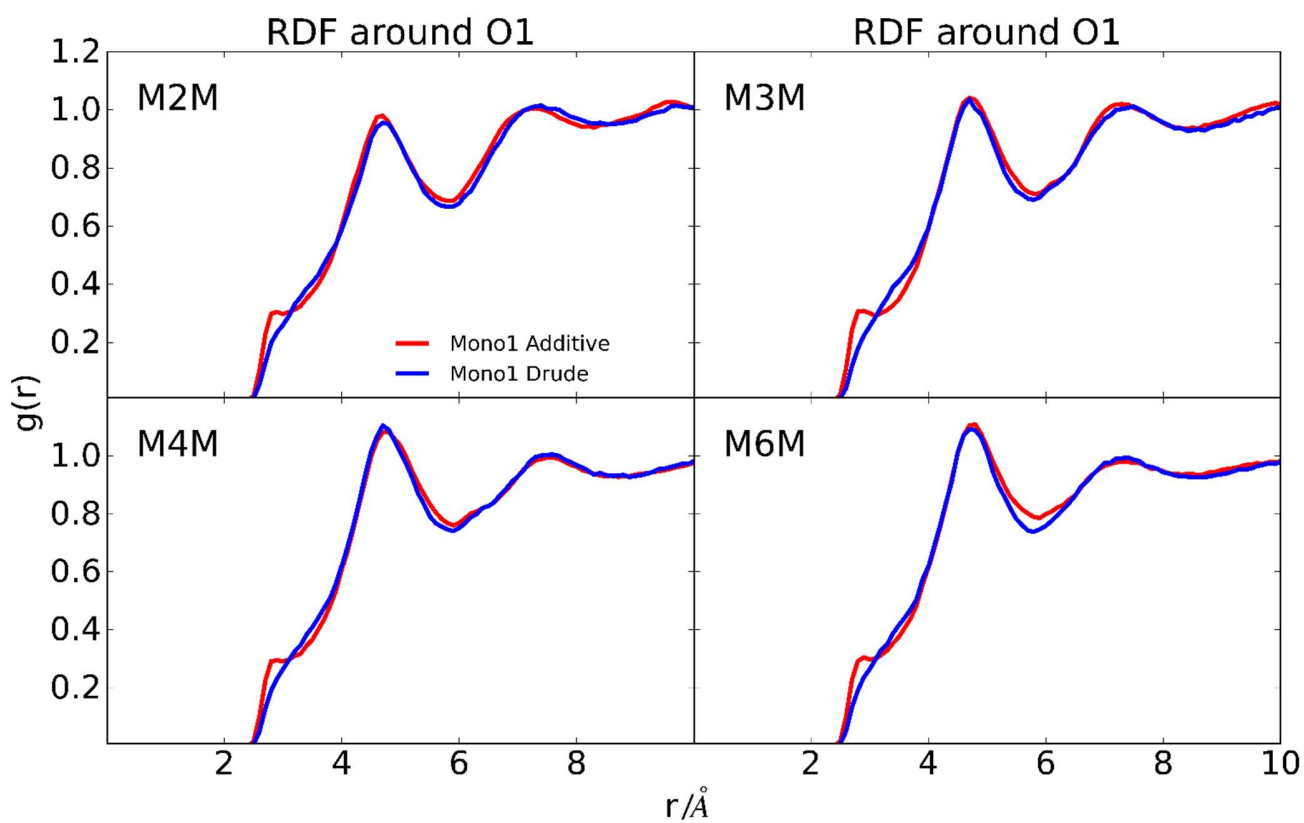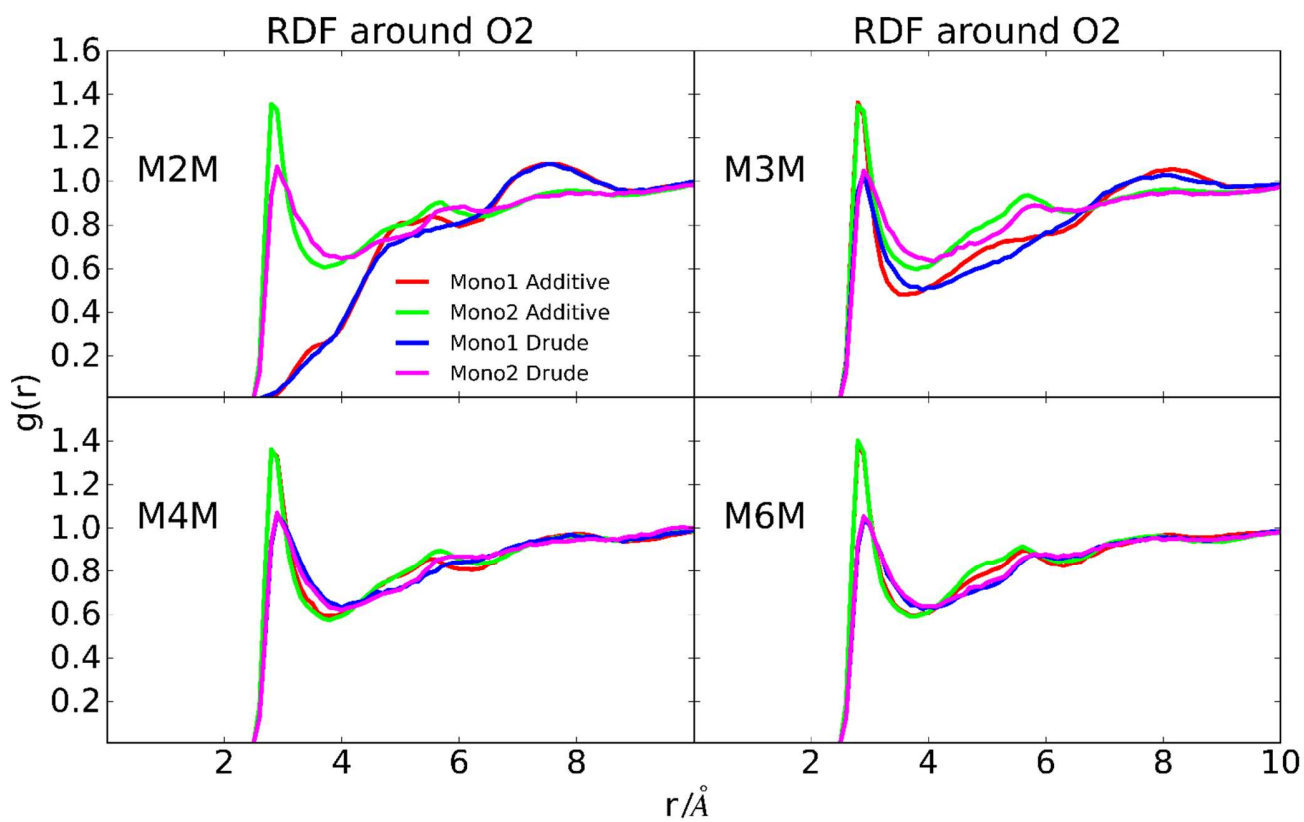

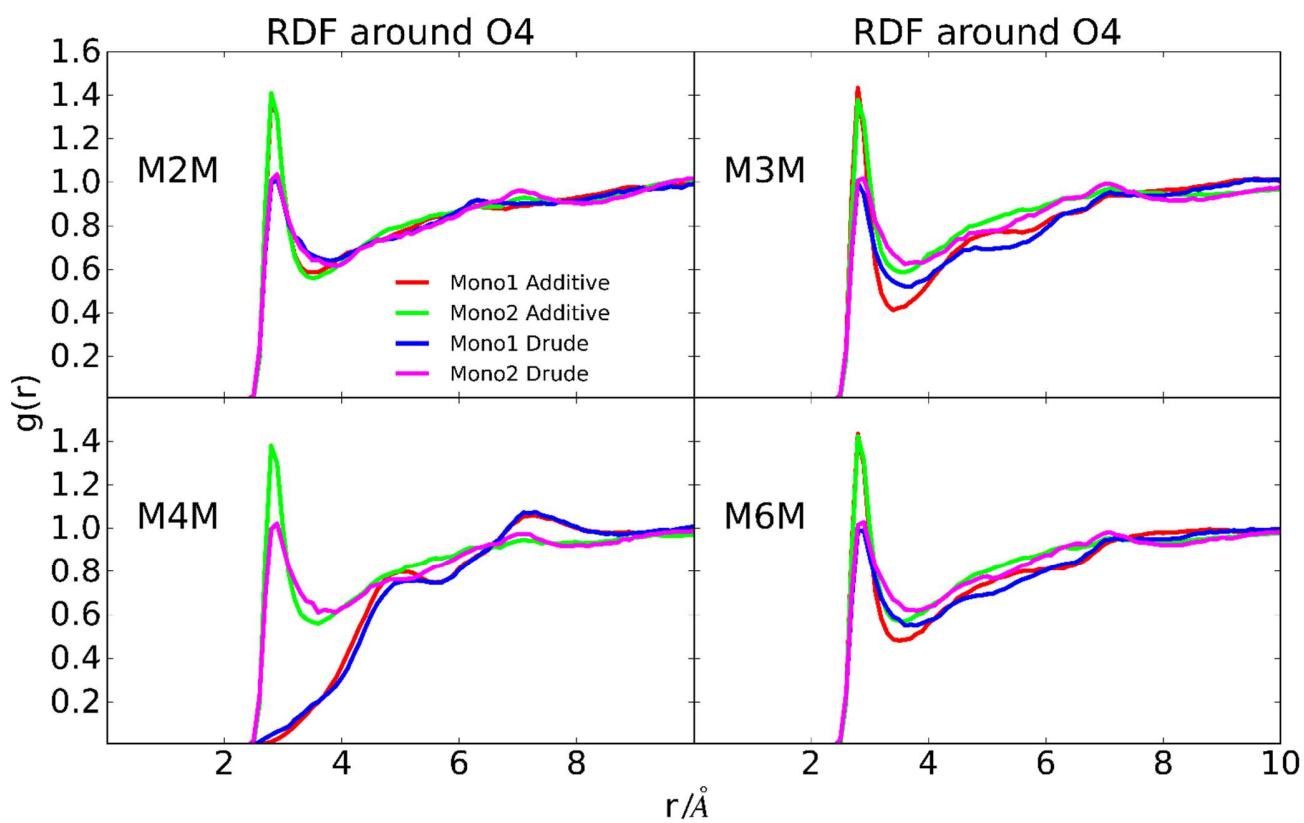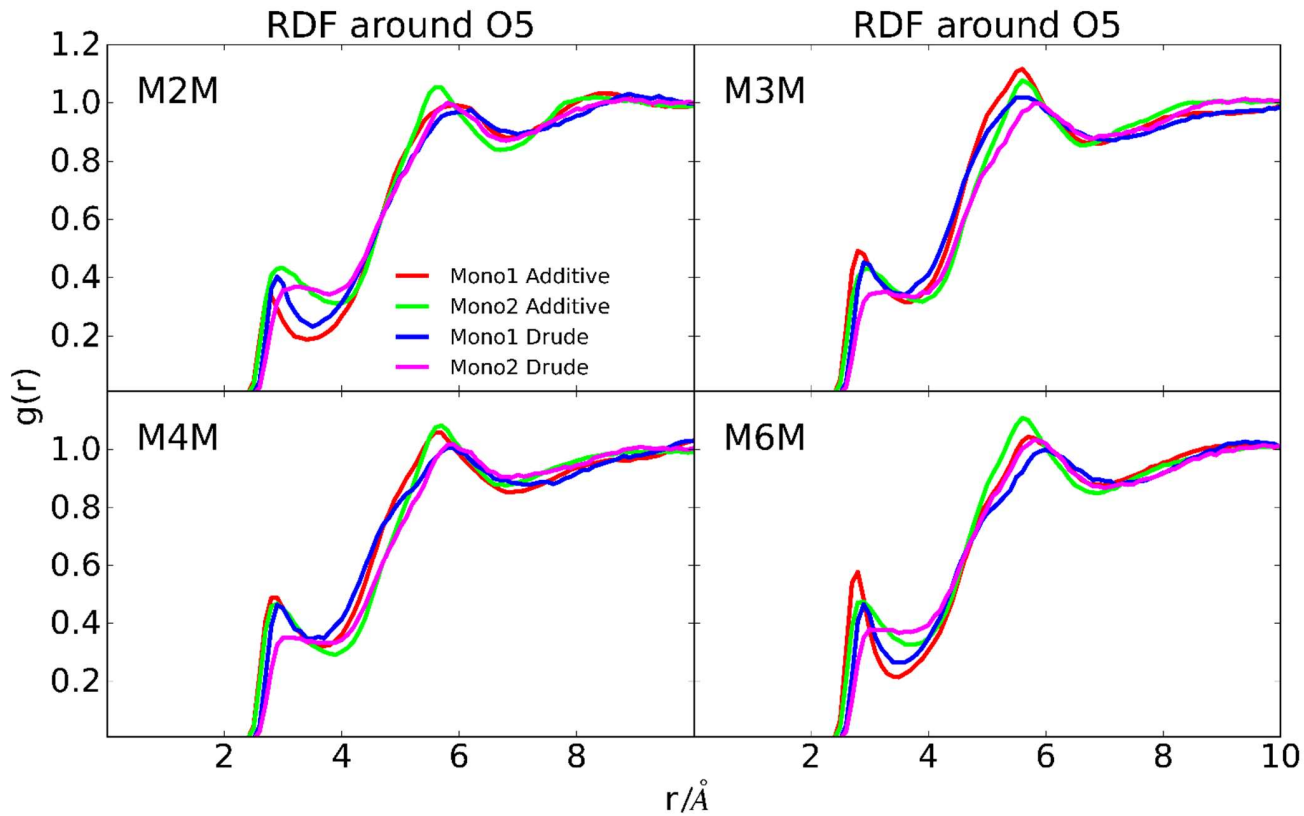



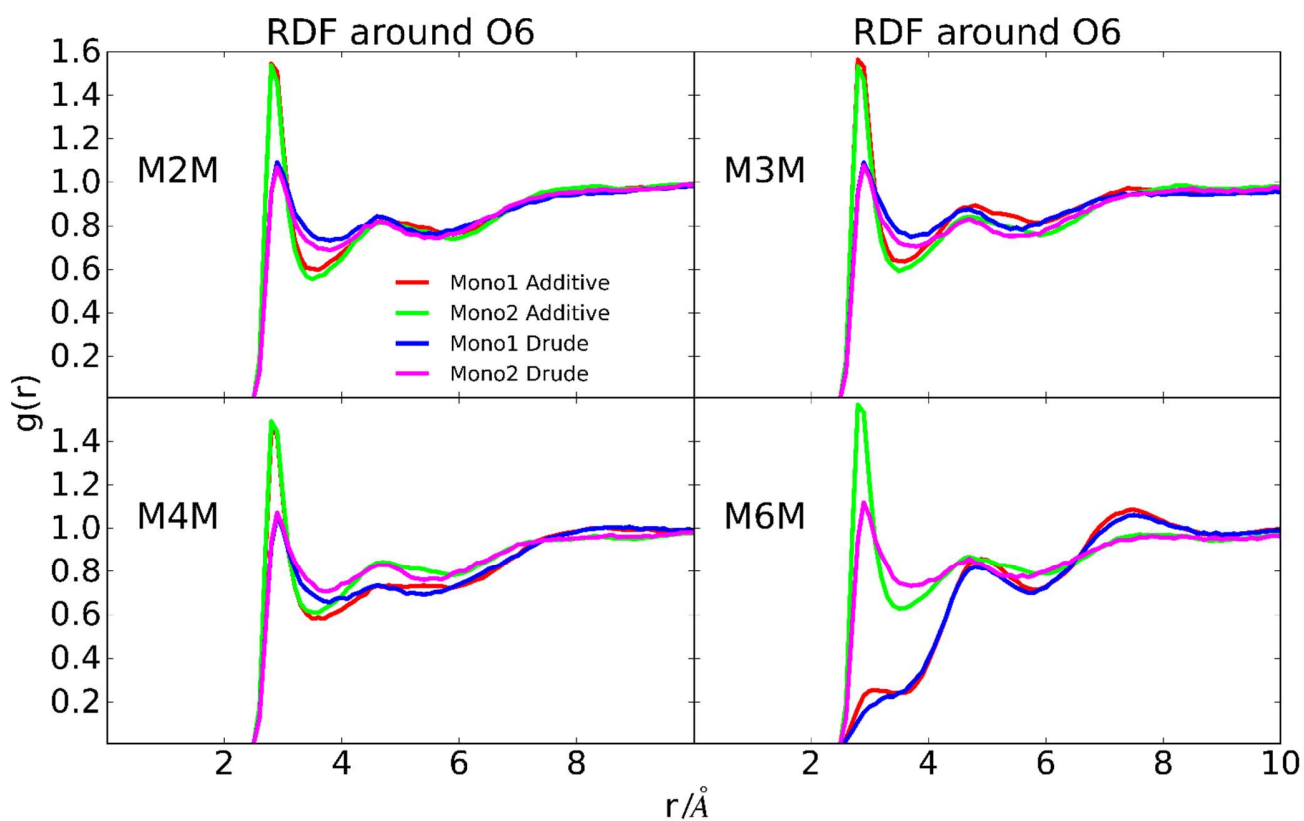

Figure S6. Radial distribution functions of water oxygen around the sugar oxygen atoms of the four disaccharides. Top to bottom panels depict RDFs for O1, O2, O4, O5 and O6. Monosaccharide 1 and 2 correspond to the reducing and terminal end residues of the disaccharides, respectively, for the additive C36 and Drude force fields as indicated by the labels the figure.
